# Supplementary material for: Evolutionary Adaptation of the Fly Pygo PHD Finger toward Recognizing Histone H3 Tail Methylated at Arginine 2
Source: PubMed Central journal article supplement (PMC3851687; doi:10.1016/j.str.2013.09.013), 2013-12-03
Supplement: mmc1.pdf [file mmc1.pdf]

**Structure, Volume 21**

**Supplemental Information**

**Evolutionary Adaptation of the Fly Pygo PHD Finger  
toward Recognizing Histone H3 Tail**

**Methylated at Arginine 2**

**Thomas C.R. Miller, Juliusz Mieszczanek, María José Sánchez-Barrena, Trevor J. Rutherford, Marc Fiedler, and Mariann Bienz**

|                               |     |     |     |     |              |       |   |   |   |   |   |   |   |   |   |   |   |   |   |   |   |   |   |   |   |   |   |   |   |   |   |   |   |   |   |   |   |   |   |   |   |   |   |   |   |   |   |   |   |   |   |   |   |     |     |   |   |   |   |   |   |     |
|-------------------------------|-----|-----|-----|-----|--------------|-------|---|---|---|---|---|---|---|---|---|---|---|---|---|---|---|---|---|---|---|---|---|---|---|---|---|---|---|---|---|---|---|---|---|---|---|---|---|---|---|---|---|---|---|---|---|---|---|-----|-----|---|---|---|---|---|---|-----|
| human Pygo1                   | 340 | VYP | CGI | CTN | <b>EVND</b>  | DQDA  | I | L | C | E | A | S | C | Q | K | W | F | H | R | I | C | T | G | M | T | E | T | A | Y | G | L | L | T | A | E | A | S | A | V | W | G | C | D | T | C | M | A | D | K | D | V | Q | L | M   | 404 |   |   |   |   |   |   |     |
| human Pygo2                   | 327 | VYP | CGA | CRS | <b>EVND</b>  | DQDA  | I | L | C | E | A | S | C | Q | K | W | F | H | R | E | C | T | G | M | T | E | S | A | Y | G | L | L | T | T | E | A | S | A | V | W | A | C | D | L | C | L | K | T | K | E | I | Q | S | V   | 391 |   |   |   |   |   |   |     |
| Xenopus laevis Pygo2          | 310 | IYP | CGA | CER | <b>EVND</b>  | DQDA  | I | L | C | E | A | S | C | Q | K | W | F | H | R | E | C | T | G | M | T | E | S | A | Y | S | L | L | T | R | E | V | S | A | V | W | A | C | D | Y | C | L | K | T | K | D | I | Q | S | V   | 374 |   |   |   |   |   |   |     |
| Danio rerio Pygo2             | 492 | VFP | CGL | CMS | <b>EVHD</b>  | DQEA  | I | L | C | E | A | S | C | Q | R | W | F | H | R | D | C | T | G | L | T | E | P | A | Y | G | L | L | T | R | E | S | A | A | V | W | A | C | D | F | C | L | K | T | K | E | I | Q | A | V   | 556 |   |   |   |   |   |   |     |
| Ciona intestinalis            | 286 | PQT | CCN | C   | S            | N     | I | Q | P | T | D | D | A | I | R | C | L | A | S | C | N | K | W | F | H | R | T | C | V | G | L | T | E | S | A | C | N | F | L | R | S | E | E | L | A | L | W | A | C | D | N | C | L | K   | T   | K | E | I | N | S | V | 350 |
| Strongylocentrotus purpuratus | 152 | LFP | CGI | CHQ | <b>VQD</b>   | SEDA  | V | I | C | V | S | S | C | H | T | W | F | H | R | I | C | T | G | M | T | T | A | Y | T | L | L | N | S | E | H | A | A | E | W | V | C | D | R | C | V | R | E | K | K | I | P | L | V | 216 |     |   |   |   |   |   |   |     |
| Trichuris muris               | 94  | ICP | CGK | CHR | <b>EIHD</b>  | NDQA  | I | Q | C | Y | R | G | C | K | F | W | F | H | R | T | C | V | G | L | V | E | E | A | W | H | M | I | V | N | E | P | Y | A | E | W | V | C | D | A | C | L | V | A | K | Q | I | P | F | V   | 158 |   |   |   |   |   |   |     |
| Trichinella spiralis          | 119 | ICP | CGK | CHR | <b>EIHD</b>  | NDQA  | I | Q | C | Y | R | G | C | K | F | W | F | H | R | T | C | V | G | L | L | E | E | A | W | H | M | I | V | N | E | P | Y | A | E | W | V | C | D | S | C | L | A | T | K | Q | I | P | C | V   | 183 |   |   |   |   |   |   |     |
| Metaseiulus occidentalis      | 70  | MYP | CGV | CHK | <b>EVHD</b>  | NDQA  | V | F | C | E | P | G | C | N | F | W | F | H | R | I | C | T | G | L | T | E | A | A | F | H | M | L | T | Q | E | I | A | A | E | W | V | C | D | K | C | A | V | H | N | K | V | P | L | V   | 134 |   |   |   |   |   |   |     |
| Tribolium castaneum           | 242 | IYP | CGV | CHK | <b>EVHD</b>  | NDQA  | I | L | C | E | S | G | C | N | F | W | F | H | R | G | C | T | G | L | T | E | A | A | F | Q | L | L | T | A | E | V | Y | A | E | W | V | C | D | K | C | L | S | S | K | N | I | P | L | V   | 306 |   |   |   |   |   |   |     |
| Solenopsis invicta            | 433 | IYP | CGI | CHK | <b>EVHD</b>  | NDQA  | I | L | C | E | S | G | C | N | F | W | F | H | R | S | C | T | G | L | T | E | Y | A | Y | Q | L | L | T | A | E | V | Y | A | E | W | V | C | D | K | C | L | Q | S | K | S | I | P | L | V   | 497 |   |   |   |   |   |   |     |
| Acyrtosiphon pisum            | 437 | IYP | CGN | CHK | <b>EVHD</b>  | NDQA  | V | L | C | E | S | G | C | N | F | W | F | H | R | V | C | T | G | L | M | E | P | A | F | Q | L | L | T | A | E | V | Y | A | E | W | V | C | D | K | C | L | Q | T | K | N | I | P | L | I   | 501 |   |   |   |   |   |   |     |
| Camponotus floridanus         | 419 | IYP | CGV | CHK | <b>EVHD</b>  | NDQA  | I | L | C | E | S | G | C | N | F | W | F | H | R | G | C | T | G | L | S | E | H | A | F | Q | L | L | T | A | E | V | Y | A | E | W | V | C | D | K | C | L | N | S | K | N | I | P | L | V   | 485 |   |   |   |   |   |   |     |
| Anopheles gambiae             | 819 | IYP | CGG | CHK | <b>EVHD</b>  | NDQG  | I | L | C | E | S | G | C | N | F | W | F | H | R | T | C | S | G | L | T | E | A | A | F | N | L | I | H | A | E | V | Y | A | E | W | V | C | D | K | C | L | N | S | K | N | I | P | L | V   | 883 |   |   |   |   |   |   |     |
| Danaus plexippus              | 424 | IYP | CGV | CHK | <b>EVHD</b>  | NDQA  | I | L | C | E | S | G | C | N | F | W | F | H | R | G | C | T | G | L | T | E | P | A | F | Q | L | L | T | A | E | V | Y | A | E | W | V | C | D | K | C | L | H | S | K | N | I | P | L | V   | 488 |   |   |   |   |   |   |     |
| Ixodes scapularis             | 146 | IYP | CGV | CHK | <b>EVHD</b>  | NDQA  | I | L | C | E | S | G | C | N | F | W | F | H | R | I | C | T | G | L | T | D | A | A | F | H | L | L | T | Q | E | V | Y | A | E | W | V | C | D | R | C | L | S | S | K | S | I | P | L | V   | 210 |   |   |   |   |   |   |     |
| Hydra magnipapillata          | 133 | IYP | CGI | CTK | <b>EVSD</b>  | TDEA  | I | L | C | E | A | G | C | E | F | W | Y | H | R | S | C | T | G | M | T | D | I | A | Y | Q | L | L | T | N | Q | D | N | A | E | W | V | C | D | K | C | I | A | T | K | S | V | P | L | V   | 197 |   |   |   |   |   |   |     |
| @Nematostella vectensis       | 6   | IYP | CGI | CQK | <b>EVND</b>  | DDDA  | I | L | C | E | T | G | C | G | R | W | Y | H | R | V | C | T | G | L | T | I | M | A | Y | N | L | L | T | A | E | T | S | A | E | W | V | C | N | S | C | I | E | S | K | N | I | P | L | V   | 70  |   |   |   |   |   |   |     |
| @Amphimedon queenslandica     | 25  | DFP | CGI | CFE | <b>EVKDE</b> | DEDEG | I | L | C | E | S | G | C | D | K | W | Y | H | R | Q | C | A | G | M | S | K | N | A | Y | D | L | L | T | R | E | D | S | A | E | W | A | C | D | T | C | I | K | K | N | N | I | P | M | T   | 89  |   |   |   |   |   |   |     |
| @Mnemiopsis leidyi            | 19  | DYP | CGI | CDE | <b>EVGD</b>  | NDDG  | I | F | C | E | S | G | C | D | L | W | Y | H | R | T | C | T | G | M | T | T | D | A | Y | K | L | L | T | T | E | V | D | A | E | W | A | C | D | N | C | I | V | R | G | G | V | K | L | V   | 83  |   |   |   |   |   |   |     |
| @Trichoplax adhaerens         | 44  | SYP | CGA | CGK | <b>EVND</b>  | NDDA  | I | L | C | E | S | G | C | D | V | W | F | H | R | A | C | T | G | L | S | Q | S | A | Y | G | Y | L | T | S | E | E | N | A | E | W | I | C | D | N | C | Y | T | S | K | A | I | P | L | T   | 108 |   |   |   |   |   |   |     |
| Drosophila Pygo               | 747 | IYP | CGM | CHK | <b>EVND</b>  | NDEA  | V | F | C | E | S | G | C | N | F | W | F | H | R | T | C | V | G | L | T | E | A | A | F | Q | M | L | N | K | E | V | F | A | E | W | V | C | D | K | C | V | S | S | K | H | I | P | M | V   | 811 |   |   |   |   |   |   |     |
| Prionchulus punctatus         | 84  | ICP | CGV | CHI | <b>EIHD</b>  | NEQA  | L | H | C | M | C | G | C | K | F | W | F | H | R | S | C | V | G | M | T | E | E | A | F | N | L | I | S | N | E | P | L | A | E | W | I | C | D | N | C | L | T | Q | K | Q | I | P | P | V   | 148 |   |   |   |   |   |   |     |

Zn<sup>2+</sup> coordinating residues C<sub>4</sub>HC<sub>3</sub>

Pocket divider

Allosteric triplet

Pygo signature EV/IN/HD

R2 binding site

T3 Channel (south wall)

@ N-terminal sequence not known

Figure S1

A

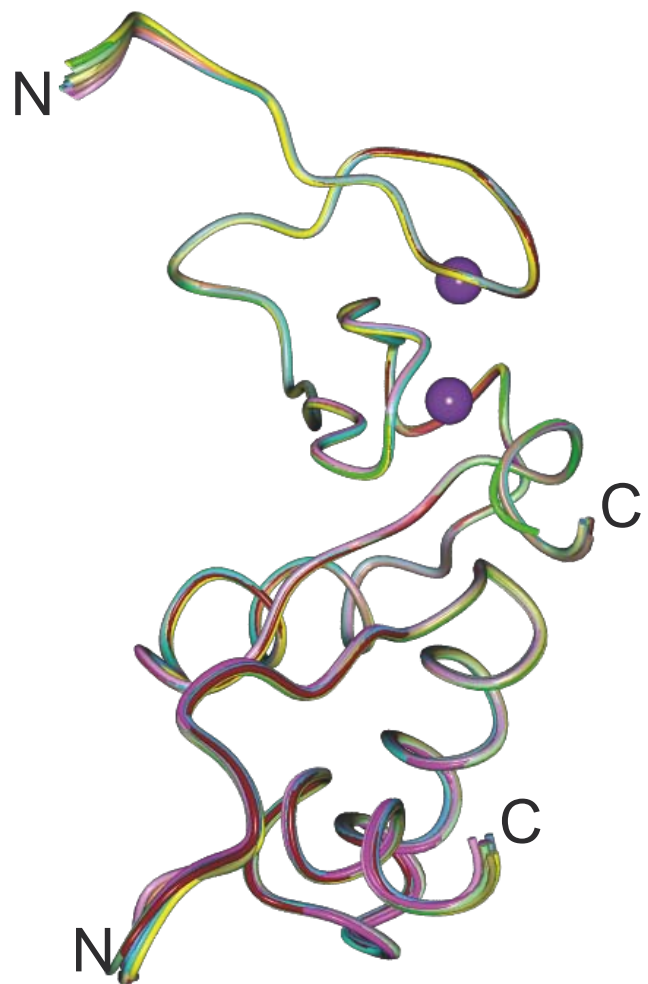

B

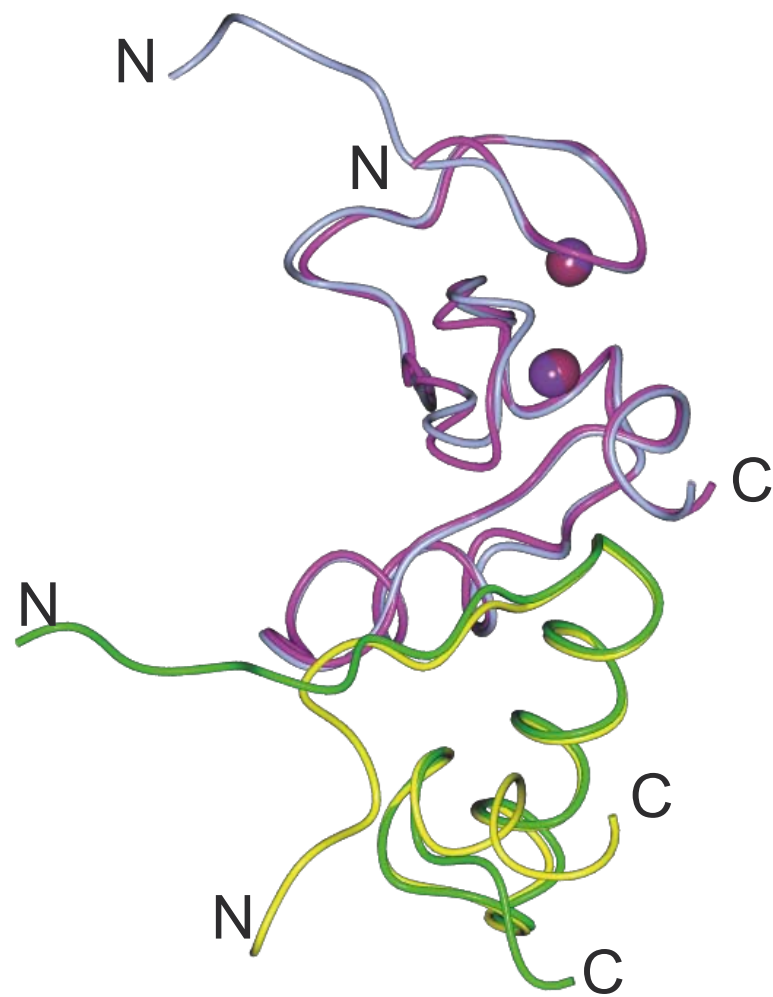

Figure S2

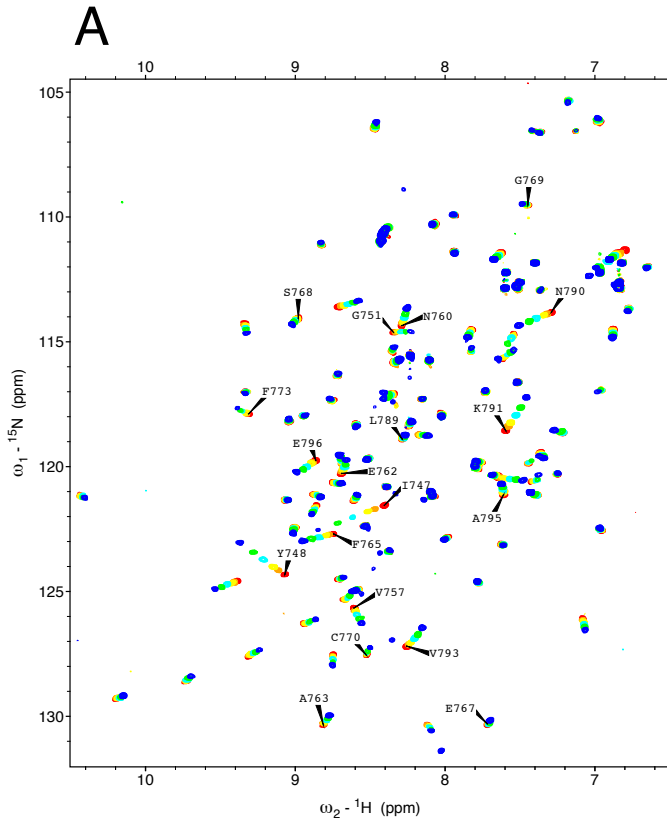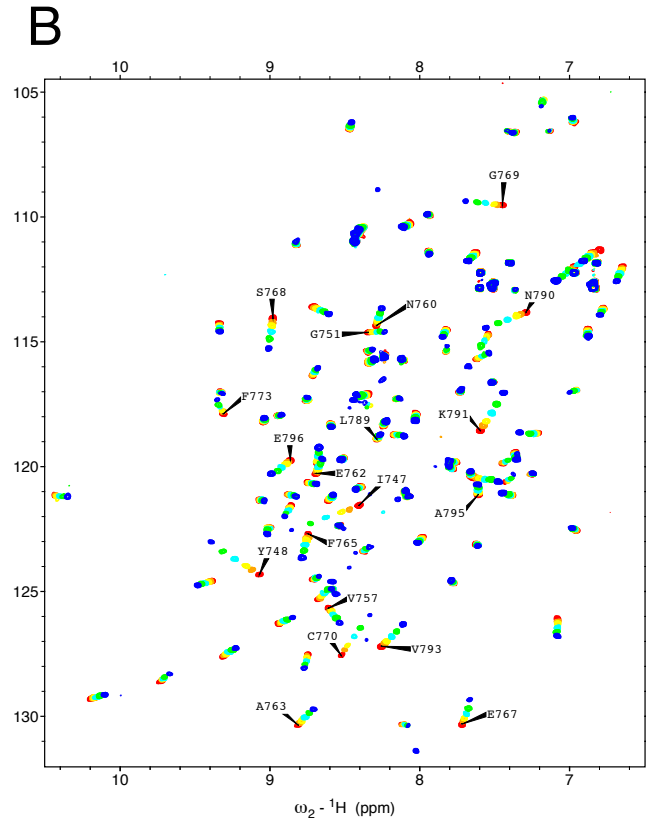

**C**

|               | H3R2me2aK4me2              |         | H3K4me2                    |         |
|---------------|----------------------------|---------|----------------------------|---------|
|               | $K_d$ ( $\mu\text{M}$ )    | std err | $K_d$ ( $\mu\text{M}$ )    | std err |
| <b>I747</b>   | 1069                       | 18      | 1032                       | 40      |
| <b>Y748</b>   | 941                        | 28      | 1100                       | 25      |
| <b>G751</b>   | 922                        | 100     | 1117                       | 118     |
| <b>V757</b>   | 1206                       | 94      | 1290                       | 109     |
| <b>N760</b>   | 1178                       | 74      | 1093                       | 96      |
| <b>E762</b>   | 1110                       | 113     | 1019                       | 167     |
| <b>A763</b>   | 1083                       | 113     | 994                        | 87      |
| <b>F765</b>   | 1111                       | 74      | 875                        | 31      |
| <b>E767</b>   | 1570                       | 156     | NAN                        |         |
| <b>S768</b>   | 1347                       | 95      | 3252                       | 507     |
| <b>G769</b>   | 1327                       | 110     | 3305                       | 1654    |
| <b>C770</b>   | 1235                       | 56      | 3314                       | 877     |
| <b>F773</b>   | 1178                       | 163     | 830                        | 148     |
| <b>L789</b>   | 844                        | 201     | 3068                       | 1265    |
| <b>N790</b>   | 1293                       | 56      | 1291                       | 60      |
| <b>K791</b>   | 1193                       | 40      | 1178                       | 38      |
| <b>V793</b>   | 1472                       | 55      | 1058                       | 46      |
| <b>A795</b>   | 983                        | 139     | 844                        | 85      |
| <b>E796</b>   | 1283                       | 88      | 1222                       | 141     |
| <b>Median</b> | 1197 +/- 275 $\mu\text{M}$ |         | 1068 +/- 223 $\mu\text{M}$ |         |

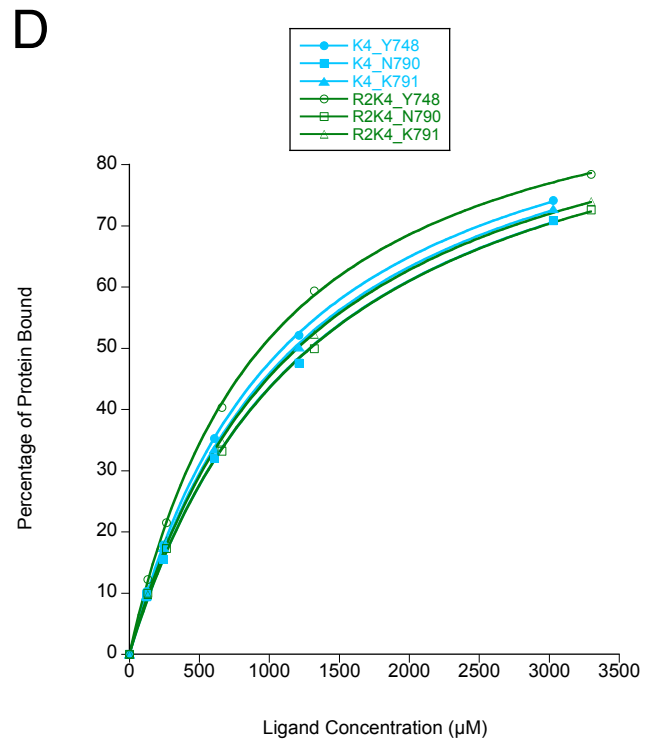

**Figure S3**

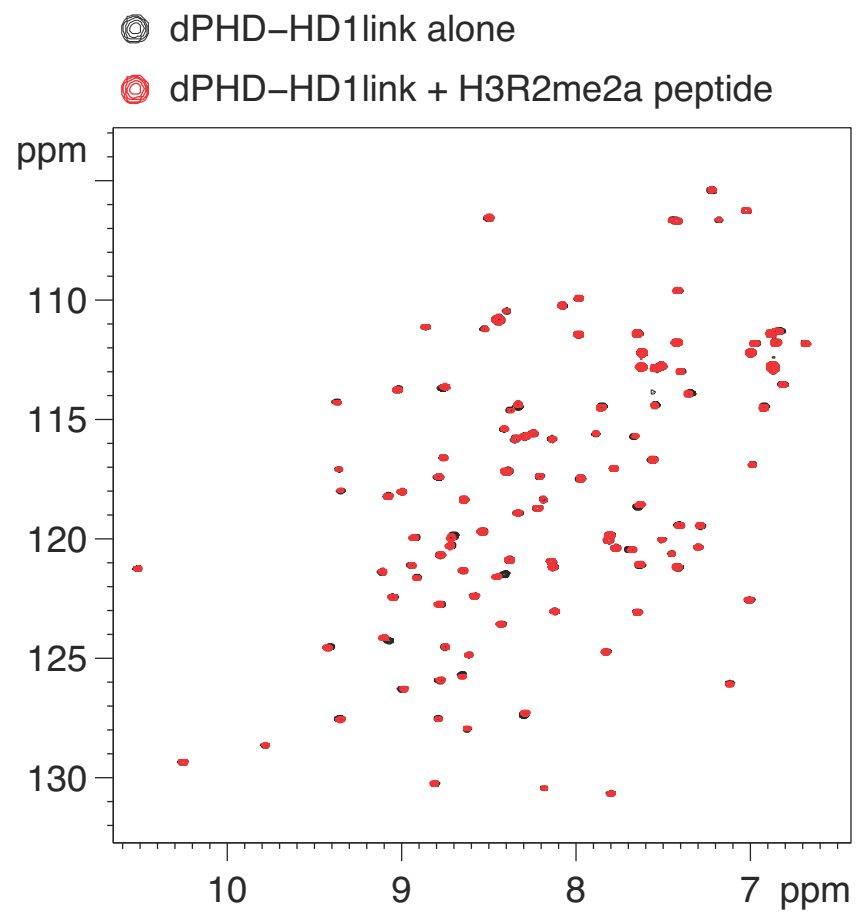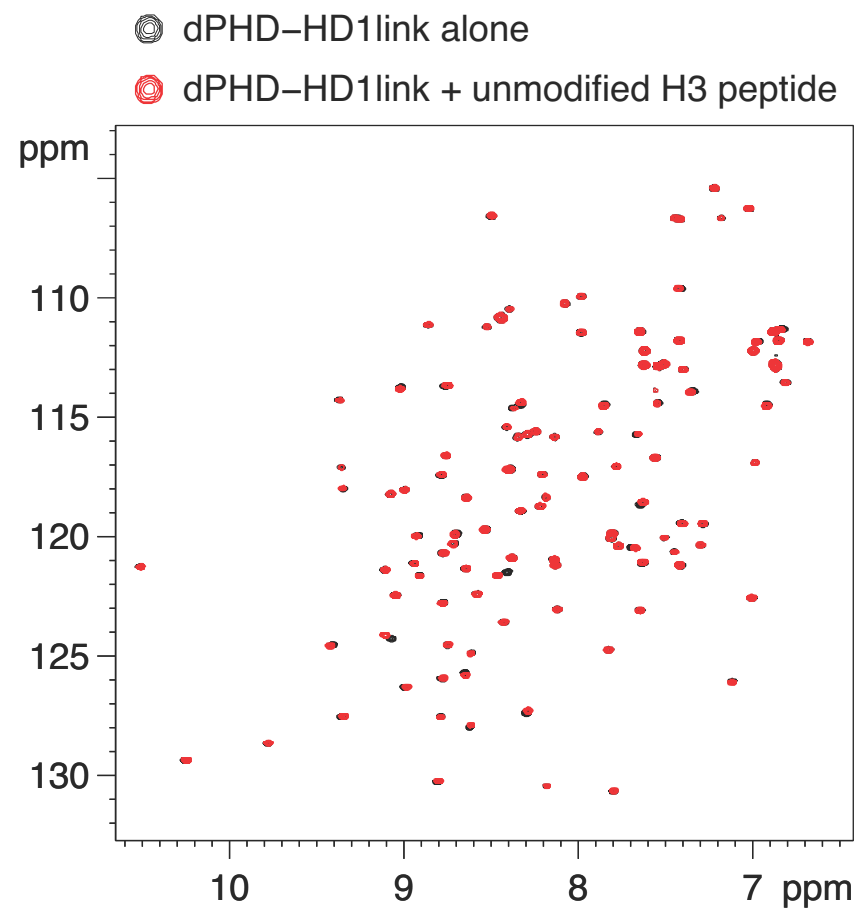

Figure S4

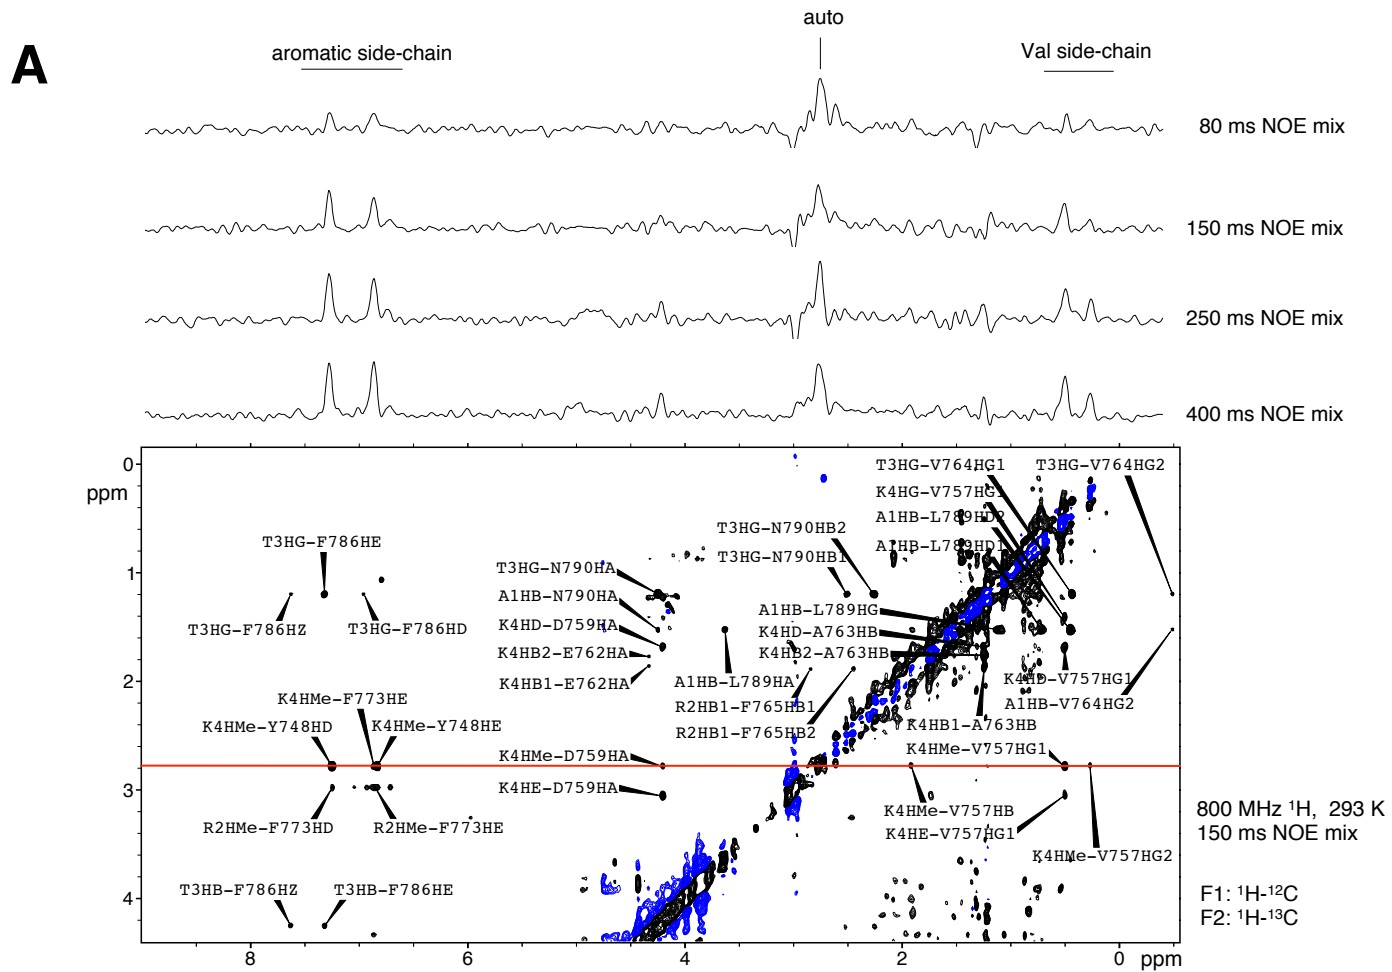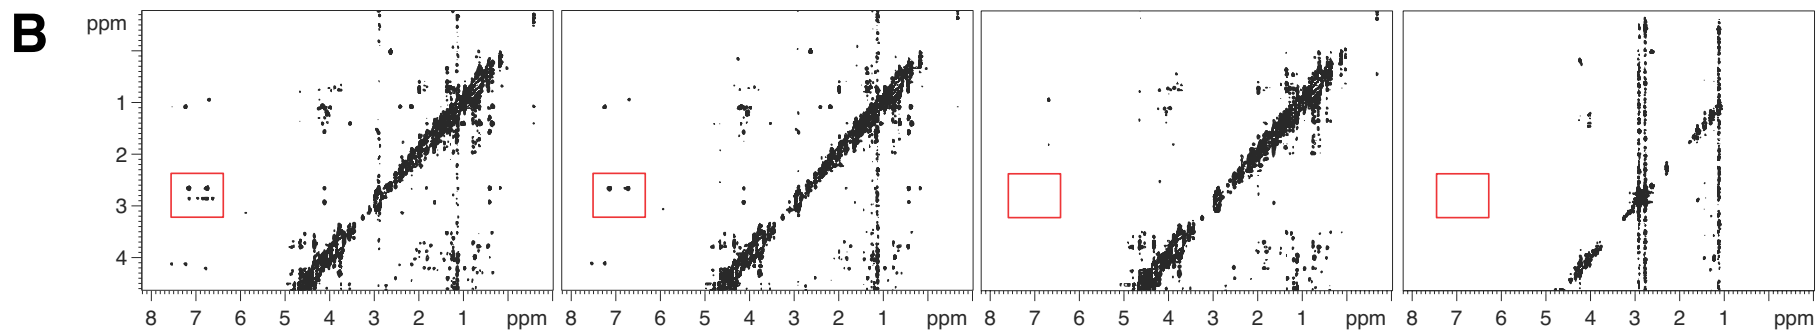

Figure S5

### Unambiguous restraints from H-H intermolecular NOE

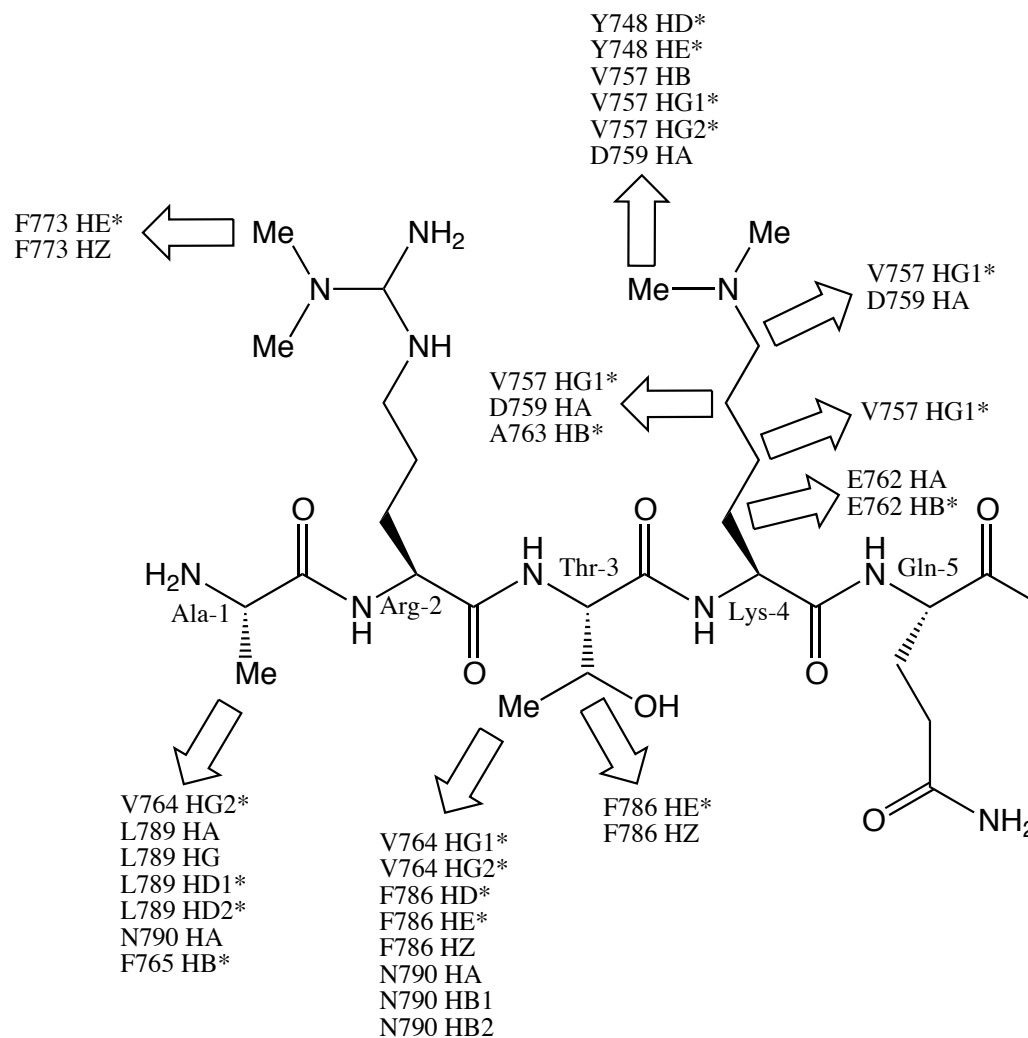

### Ambiguous restraints from chemical shift perturbation

active residues (15): 351, 747, 748, 758, 760-3, 767-9, 773, 790, 791, 793

passive residues (8): 323, 325, 352, 756, 771, 772, 794, 795

active residues for peptide (5): 1-5

Figure S6

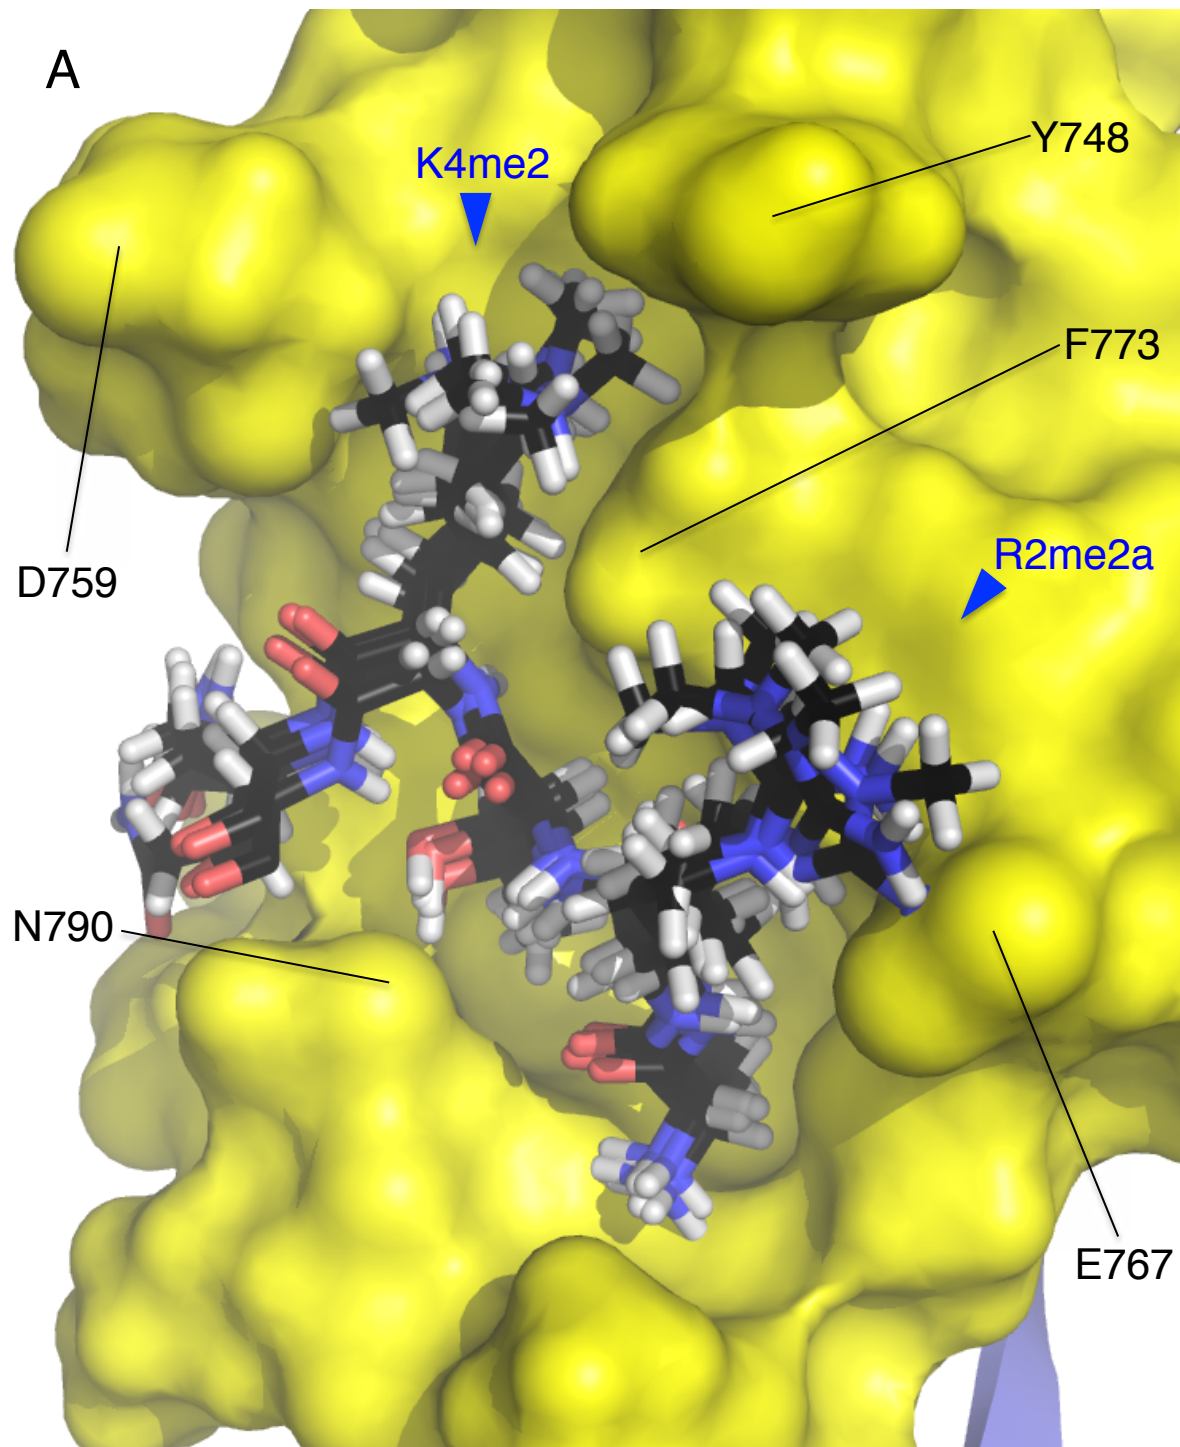

**B**

|                                                         |                   |
|---------------------------------------------------------|-------------------|
| Buried surface area ( $\text{\AA}^2$ )                  | $1076.4 \pm 40.0$ |
| Total interaction energy (kcal/mol)                     | $-254.7 \pm 27.7$ |
| van der Waals interaction energy (kcal/mol)             | $-43.7 \pm 3.4$   |
| electrostatic interaction energy (kcal/mol)             | $-211.0 \pm 27.5$ |
| desolvation energy (kcal/mol)                           | $4.0 \pm 1.4$     |
| backbone RMSD from reference structure ( $\text{\AA}$ ) | $0.87 \pm 0.27$   |
| ligand backbone RMSD from mean                          | $0.71 \pm 0.25$   |

Figure S7



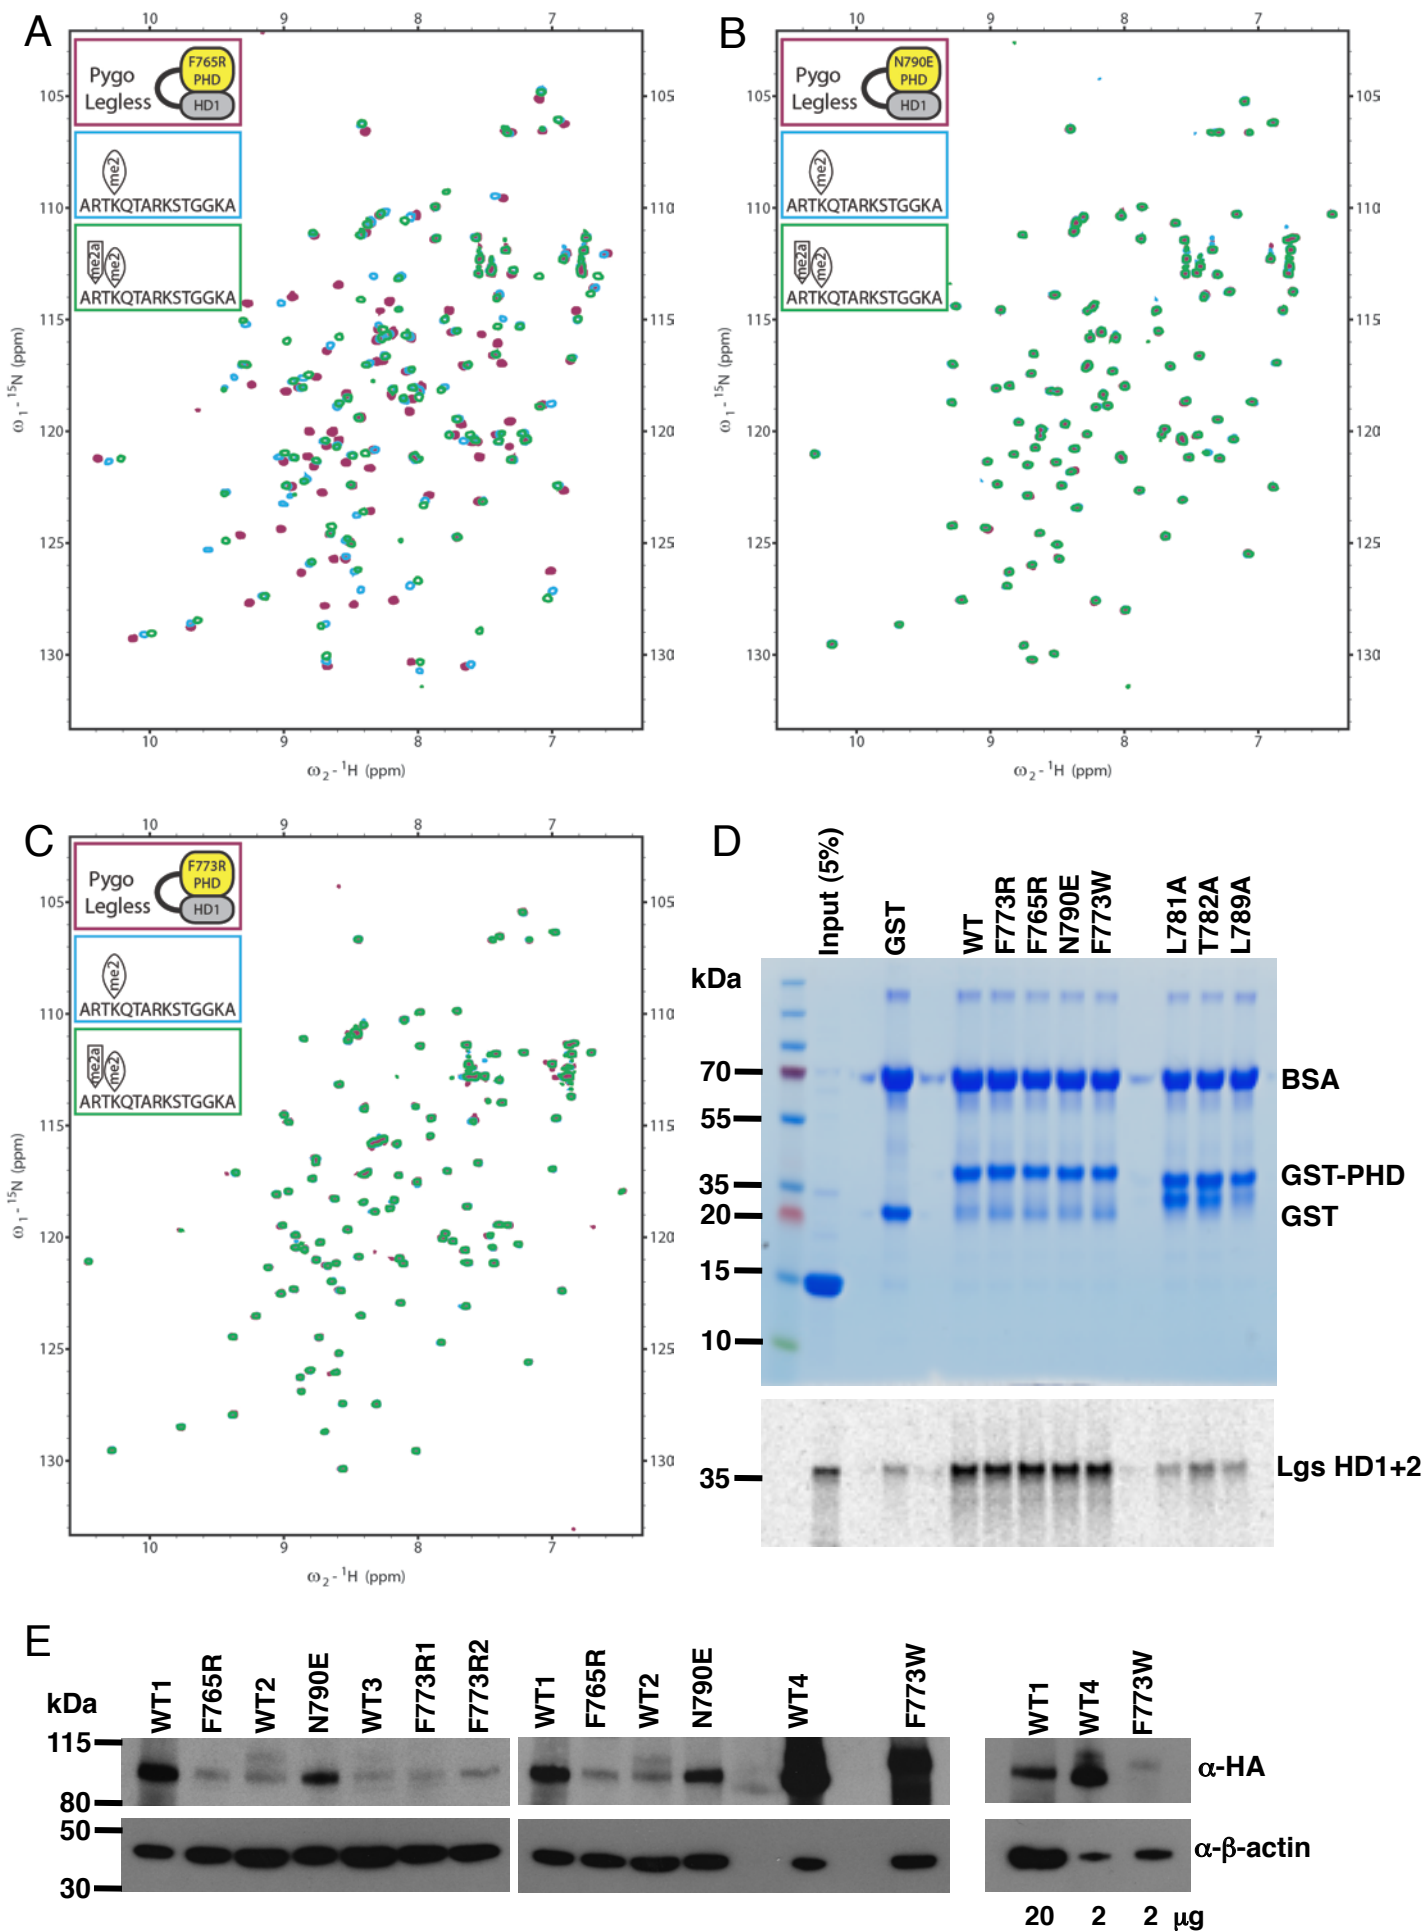

Figure S8

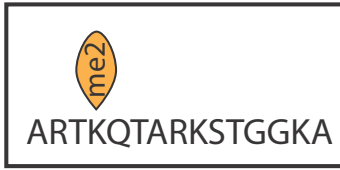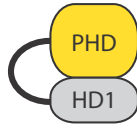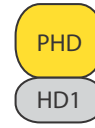

Wild Type

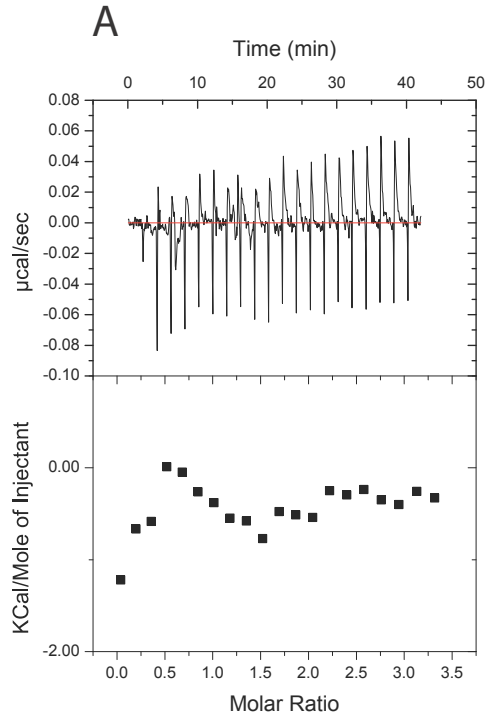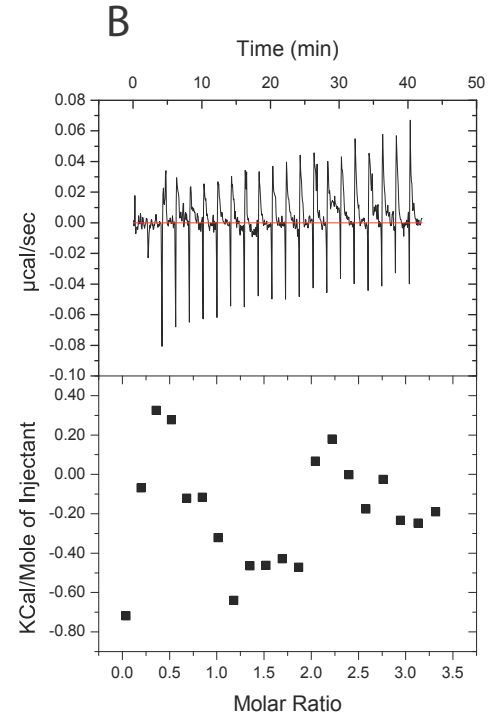

F773W

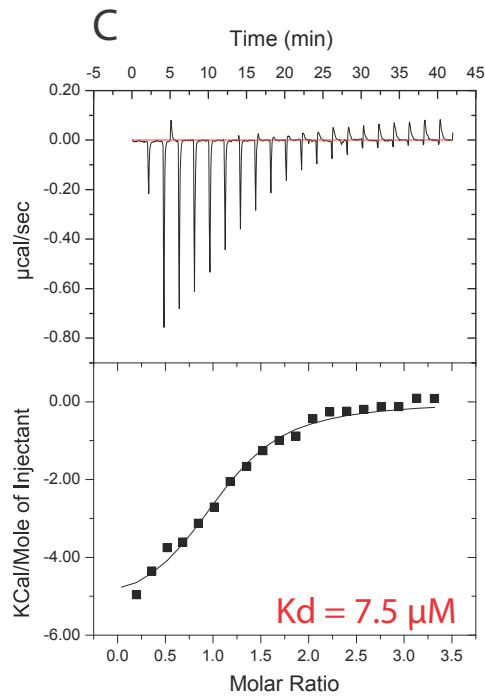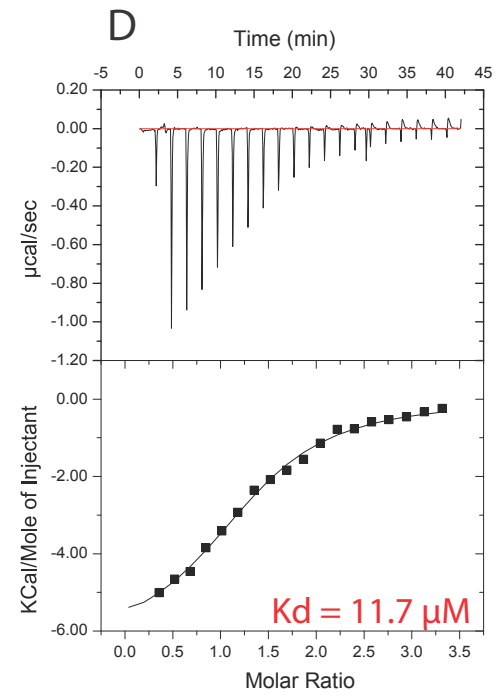

Figure S9

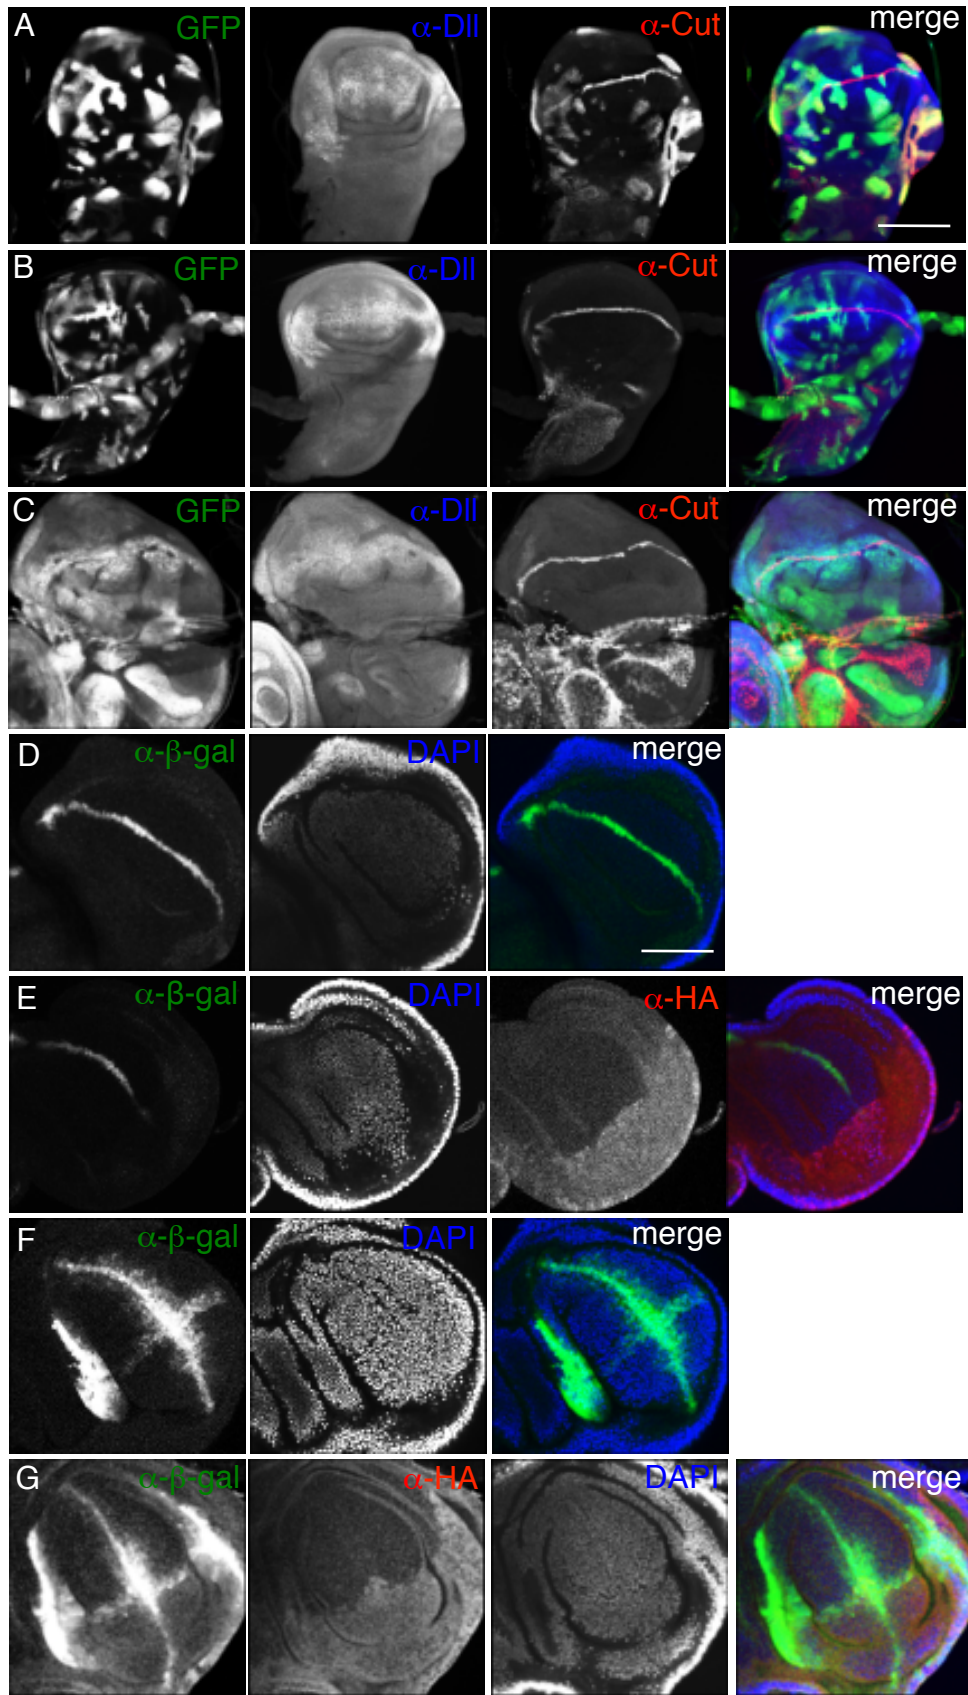

Figure S10

## SUPPLEMENTAL FIGURE LEGENDS

**Fig. S1** (related to Fig. 1)

**Conservation of Pygo PHD fingers amongst animal phyla.** Alignments of PHD sequences of *bona fide* Pygo orthologs from 9 different phyla (of 35 known animal phyla), which contain a match to the Pygo signature motif EVND (magenta) and an NPF motif in their N-terminus (Thompson et al., 2002), except for those marked by @ for which the only known sequence is for the C-terminal PHD-containing fragment; green, pocket divider; blue, R2 binding site; grey, T3 channel; yellow, allosteric triplet (including PHD signature residue W); red, Zn<sup>2+</sup>-coordinating residues; numbers indicate total Pygo residues (right), and first PHD residue (left). The following accession numbers were used: Amphimedon XP\_003385401, Tribolium EFA11073.1, Trichoplax XP\_002110816.1, Campotonus EFN72586, Ixodes XP\_002413030.1, Hydra XP\_002160262.1, Strongylocentrotus XP\_791313.1, Danaus EHJ76837.1, Mnemiopsis ADO34165.1, Metuseiulus XP\_003741865.1, Anopheles XP\_003436178.1, Acyrthosiphon XP\_001946189.2, Ciona XP\_002128934.1, Trichinella XP\_003381121.1, Nematostella XP\_001629729.1, Solenopsis EFZ11656.1, Danio NP\_001028283.2 (Pygo2), Xenopus AAM94597.1 (Pygo2), hPygo1 AF457207, hPygo2 AAH06132; Drosophila AAF57161, Ceratitis (medfly) XP\_004529202.1; Trichuris (Tmu-pygo-1), Prionchulus (Ppu-pygo-1) (J. Pettitt, personal communication).

**Fig. S2** (related to Table 1)

**Comparison between *Drosophila* and human PHD-HD1 complex.** Superimposition of backbones of (A) 18 dPHD-HD1 complexes found in the asymmetric unit and (B) *Drosophila* (PHD, blue; HD1,

yellow) and human PHD-HD1 complex (2vpb; hPygo1 PHD, magenta; BCL9 HD1, green). X-ray diffraction data were processed with Mosflm (Leslie, 2006) and scaled with Scala (Evans, 2006) (**Table 1**), and the *Drosophila* structure was solved by molecular replacement with Phaser (McCoy et al., 2005) based on 2vpb, and refined at 2.68 Å with Refmac (Murshudov et al., 1997). The models were updated with Coot (Emsley and Cowtan, 2004), and their stereochemistry was verified with MolProbity (Chen et al., 2010), and analyzed with the CCP4i programs (Winn et al., 2011). Note that the 18 *Drosophila* complexes in the asymmetric unit are structurally the same, and their consensus backbone is very similar to that of the human complex (rmsd value of 0.85 Å), with some differences due to different crystal contacts with symmetry-related molecules (mainly in the unstructured N-terminus of HD1, but also in its C-terminus).

**Fig. S3** (related to Fig. 4)

**NMR titrations of PHD-HD1link with histone H3 peptides.** (A, B) Overlay of HSQC spectra of 50 µM <sup>15</sup>N-labelled PHD-HD1link incubated with increasing concentrations of (A) H3K4me2 or (B) H3R2me2aK4me2; 19 PHD residues with shift perturbation values of >0.1 at the top concentration are labelled; red, no peptide; orange, 120 µM; yellow, 250 µM; cyan, 600 µM; green, 1.2 mM; blue, 3.0 mM; spectra shown in main **Fig. 4** correspond to red (no peptide) and cyan (1.2 mM peptide). (C)  $K_d$  values (in µM) and standard errors (std err), derived from spectra shown in (A, B).  $K_d$  values were obtained by fitting the chemical shift perturbations for 5 different ligand concentrations (after minor adjustments of concentrations following amino acid analysis of peptides) to a quadratic equation for single-site binding,  $d_{\text{obs}} = 0.5 * m1 * (L_T + P_T + K_d - \sqrt{(L_T + P_T - K_d)^2 - 4 * L_T * P_T})$ , using Kaleidagraph version 4.1, where  $L_T$  and  $P_T$  are the total concentrations of ligand and protein, and  $K_d$  and  $m1$  are floating variables in the fit; median  $K_d$  values for the two peptides were derived from residues with

low standard errors (bold, std err <150). Note that the residues supporting the R2 groove floor (S768-C770) show considerably higher affinities to dually- compared to singly-modified peptide (median values 1.30 versus 3.29 mM, with the caveat that the values for the singly-modified peptide show relatively large fitting errors, an indication that this ligand does not interact properly with its cognate PHD surface), which might imply a preference of the R2 groove to accommodate H3R2me2aK4me2 over H3K4me2. **(D)** Kaleidagraph plots of selected residues for singly- (cyan, K4) or dually-modified (green, R2K4) peptide, as indicated in box (after fitting either to the change in  $^1\text{H}$  or  $^{15}\text{N}$  chemical shift for a given correlation peak, depending on which varied the greatest); percentage of bound protein (after normalization) is plotted against increasing peptide concentrations.

**Fig. S4** (related to Fig. 4)

**Lack of binding between PHD-HD1link and histone H3 peptides without methylated K4.**

Overlays of HSQC spectra of 50  $\mu\text{M}$   $^{15}\text{N}$ -labelled PHD-HD1link + 1 mM H3R2me2a or unmodified histone H3 peptide (red) onto PHD-HD1link alone (black), as indicated above panels.

**Fig. S5** (related to Fig. 5)

**NOESY spectra from PHD-HD1 probed with histone H3 peptides. (A)** Double half-filtered 2D

$^1\text{H}$ - $^1\text{H}$  NOESY spectrum from  $^{13}\text{C}$ - $^{15}\text{N}$ -labelled dPHD-HD1link (500  $\mu\text{M}$ ) probed with 3 mM unlabelled H3R2me2aK4me2, annotated with assignments to specific H-H contacts (see also **Fig. S6**). Note that the multiplicity of the observed NOE correlation peaks was independent of whether  $^{15}\text{N}$ -decoupling pulses were applied in  $t_1$ , indicating that all NOE transfer originates from  $^1\text{H}$ ( $^{12}\text{C}$ ), and not  $^1\text{H}$ ( $^{15}\text{N}$ ). Furthermore, the traces above the panel, taken at the  $f_1$  frequency indicated by the red

line, show that NOE cross-peak intensity was dependent upon NOE mixing time ( $\tau_m$ ), verifying that the peaks are derived from NOE transfer rather than from other artifactual transfer pathways. **(B)** Double half-filtered 2D  $^1\text{H}$ - $^1\text{H}$  NOESY spectra for H3R2me2aK4me2 (same spectrum as in **A**) or H3K4me2 (*second panel*), compared to control spectra derived from protein-only (500  $\mu\text{M}$  dPHD-HD1 in deuterated aqueous phosphate buffer; *third panel*) or peptide-only (3 mM H3R2me2aK4me2 in deuterated aqueous phosphate buffer; *fourth panel*); boxed regions reveal crucial NOEs from histone peptide *N*-methyl groups and aromatic protons of dPHD-HD1link that are absent in the two control spectra (see also main **Fig. 5**).

**Fig. S6** (related to Fig. 5)

**Compilation of restraints derived from NOESY spectra and CSPs.** Top, unambiguous restraints with regard to dually-methylated histone H3 peptide (A1 - Q5), derived from H-H intermolecular NOEs. Bottom, list of ambiguous restraints, derived from CSPs. Note that, due to low signal:noise in (HB)CB(CGCD)HD assignment spectra (Yamazaki et al., 1993) which correlate  $\text{C}\beta$  with aromatic proton resonances in the same residue, no signals were evident for F765, precluding an unambiguous assignment for its side chain. However, 4 unassigned cross-peaks from the *N*-methyl groups to aromatic protons are consistent with contacts involving the F765 phenyl ring (see **Fig. S5**), but since this assignment could not be confirmed independently, these 4 contacts were not included in the NOE restraints file used to guide the docking simulations.

**Fig. S7** (related to Fig. 5)

**Ensemble of HADDOCK models and refinement statistics.** (A) Top 4 poses of single cluster, based on HADDOCK score, of dually-modified histone H3 peptide (in stick representation; amino acids 6 and 7 of histone H3 were omitted, for clarity; colors are as in main **Fig. 2**) bound to PHD-HD1link (surface representation, yellow), with key residues labelled. (B) Refinement statistics for 200/200 HADDOCK models in the single cluster.

**Fig. S8** (related to Fig. 7)

**Characterization of wt and mutant Pygo.** (A-C) Overlay of HSQC spectra of 50  $\mu$ M  $^{15}$ N-labelled mutant PHD-HD1link (as indicated in panels) + 1 mM H3K4me2 (cyan) or H3R2me2aK4me2 (green) onto PHD-HD1link alone (magenta), indicating reduced binding of F765R (A), but complete loss of histone binding of N790E (B) and F773R (C); note the well-dispersed spectra of these mutants, confirming that they retain normal folding. (D) Top, SDS-PAGE of purified wt or mutant PHD-HD1link, as indicated above panel, used for pull-down assays with  $^{35}$ S-methionine-labelled Lgs(HD1+2), as previously described (Townesley et al., 2004); the band at 15 kD in the input lane corresponds to globin (in the reticulocyte lysate used for *in vitro* labelling); 1 mg/ml bovine serum albumin (BSA) was added, to minimize unspecific binding. Underneath, autoradiogram of SDS-PAGE, revealing normal (wt) levels of Lgs binding of the histone-surface mutants used in this study; by contrast, Lgs binding mutants (L781A, T782A, L789A) show much reduced binding, as reported (Townesley et al., 2004), at the level of unspecific binding observed in the GST control lane. (E) Western blots of total embryonic extracts, prepared as described (Mendoza-Topaz et al., 2011), probed with antibodies as indicated on the right, to reveal expression levels of wt and mutant HA-



Pygo used in this study (F773W, Pygo-gof; positions of molecular weight markers on the left); 20 µg of total protein was used per lane, unless otherwise specified.

**Fig. S9** (related to Fig. 8)

**Binding of wt and gof mutant *Drosophila* PHD-HD1 to histone H3 peptide.** ITC profiles for the binding of H3K4me2 (15-mer) to wt or F773W (gof) mutant PHD-HD1 complexes (amino acids 744-803 and 321-352, respectively), cloned in pETM30 as tandem domains separated by SGSLEVLFGPGSG (containing a PreScission cleavage site), and purified with or without cleavage (as indicated above panels) after removal of the GST tag, and dialysis into 100 mM NaCl, 25 mM Tris-HCl pH 8.0, as described (Miller et al., 2010). Data were fitted to a one-site model, as previously described (Miller et al., 2010), and  $K_d$  values are given in the individual panels. Neither wt complex yielded reliable recordings, in contrast to a previously reported recording for the unlinked *Drosophila* complex obtained with a different ITC set-up, elsewhere (Fiedler et al., 2008) which also yielded 3-4x higher values for hPHD-HD1 (Miller et al., 2010). Note also that the linked PHD-HD1-gof complex exhibits a slightly higher affinity for H3K4me2 than the unlinked PHD-HD1-gof complex (which shows a marked tendency to dissociate), likely because of its 1:1 stoichiometry, demonstrating full functionality of the linked complex.

**Fig. S10** (related to Fig. 8)

**Pygo-gof acts through Notch targets.** (A-C) Single confocal sections through wing discs as in **Fig. 8A, B**, bearing 'flip-on' clones (marked by GFP, green) that overexpress (A) Pygo-gof, (B) WT1 or (C) Arm-S10, triple-stained with antibodies against Dll (blue), Cut (red), and DAPI (to monitor the focal plane); merges

on the right. Note that the staining patterns with WT1 (**B**) are indistinguishable from control discs (without Pygo overexpression) since the Pygo overexpression in this line is considerably lower than that of WT4 (see **Fig. S6B**) shown in main **Fig. 8B** (so does not repress normal *cut* expression). (**D-G**) Single confocal sections of prospective wing blade territories within the young wing discs shown in main **Fig. 8C-F**, triple-stained with antibodies against  $\beta$ -galactosidase (green), HA (red) and DAPI (blue); (**D, E**) *cut-lacZ*; (**F, G**) *wg-lacZ*. Size bars, (**A-B**) 50  $\mu\text{m}$  or (**D-G**) 25  $\mu\text{m}$ .

## SUPPLEMENTAL REFERENCES

- Chen, V.B., Arendall, W.B., 3rd, Headd, J.J., Keedy, D.A., Immormino, R.M., Kapral, G.J., Murray, L.W., Richardson, J.S., and Richardson, D.C. (2010). MolProbity: all-atom structure validation for macromolecular crystallography. *Acta crystallogr D Biol crystallogr* 66, 12-21.
- Emsley, P., and Cowtan, K. (2004). Coot: model-building tools for molecular graphics. *Acta Crystallogr D Biol Crystallogr* 60, 2126-2132.
- Evans, P. (2006). Scaling and assessment of data quality. *Acta Crystallogr D Biol Crystallogr* 62, 72-82.
- Fiedler, M., Sanchez-Barrena, M., Nekrasov, M., Mieszczanek, J., Rybin, V., Muller, J., Evans, P., and Bienz, M. (2008). Decoding of methylated histone H3 tail by the Pygo-BCL9 Wnt signaling complex. *Mol Cell* 30, 507-518.
- Leslie, A.G. (2006). The integration of macromolecular diffraction data. *Acta Crystallogr D Biol Crystallogr* 62, 48-57.
- McCoy, A.J., Grosse-Kunstleve, R.W., Storoni, L.C., and Read, R.J. (2005). Likelihood-enhanced fast translation functions. *Acta Crystallogr D Biol Crystallogr* 61, 458-464.
- Mendoza-Topaz, C., Mieszczanek, J., and Bienz, M. (2011). The Adenomatous polyposis coli tumour suppressor is essential for Axin complex assembly and function and opposes Axin's interaction with Dishevelled. *Open Biol* 1, 110013.
- Miller, T.C., Rutherford, T.J., Johnson, C.M., Fiedler, M., and Bienz, M. (2010). Allosteric remodelling of the histone H3 binding pocket in the Pygo2 PHD finger triggered by its binding to the B9L/BCL9 co-factor. *J Mol Biol* 401, 969-984.

Murshudov, G.N., Vagin, A.A., and Dodson, E.J. (1997). Refinement of macromolecular structures by the maximum-likelihood method. *Acta Crystallogr D Biol Crystallogr* 53, 240-255.

Otting, G., and Wüthrich, K. (1989). Extended heteronuclear editing of 2D  $^1\text{H}$  NMR spectra of isotope-labeled proteins, using the  $X(\omega_1, \omega_2)$  double half filter. *J Magn Reson* 85, 586-594.

Thompson, B., Townsley, F., Rosin-Arbesfeld, R., Musisi, H., and Bienz, M. (2002). A new nuclear component of the Wnt signalling pathway. *Nat Cell Biol* 4, 367-373.

Townsley, F.M., Thompson, B., and Bienz, M. (2004). Pygopus residues required for its binding to Legless are critical for transcription and development. *J Biol Chem* 279, 5177-5183.

Winn, M.D., Ballard, C.C., Cowtan, K.D., Dodson, E.J., Emsley, P., Evans, P.R., Keegan, R.M., Krissinel, E.B., Leslie, A.G., McCoy, A., *et al.* (2011). Overview of the CCP4 suite and current developments. *Acta crystallogr D Biol crystallogr* 67, 235-242.

Yamazaki, T., Forman-Kay, J.D., and Kay, L.E. (1993). Two-dimensional NMR experiments for correlating  $^{13}\text{C}\beta$  and  $^1\text{H}\delta/\epsilon$  chemical-shifts of aromatic residues in  $^{13}\text{C}$ -labeled proteins via scalar couplings. *J Am Chem Soc* 115, 11054-11055.
